# Supplementary material for: Oct4 regulates the embryonic axis and coordinates exit from pluripotency and germ layer specification in the mouse embryo
Source: PubMed Central journal article supplement (PMC6031404; doi:10.1242/dev.159103), 2018-06-18
Supplement: develop-145-159103-s1.pdf [file develop-145-159103-s1.pdf]

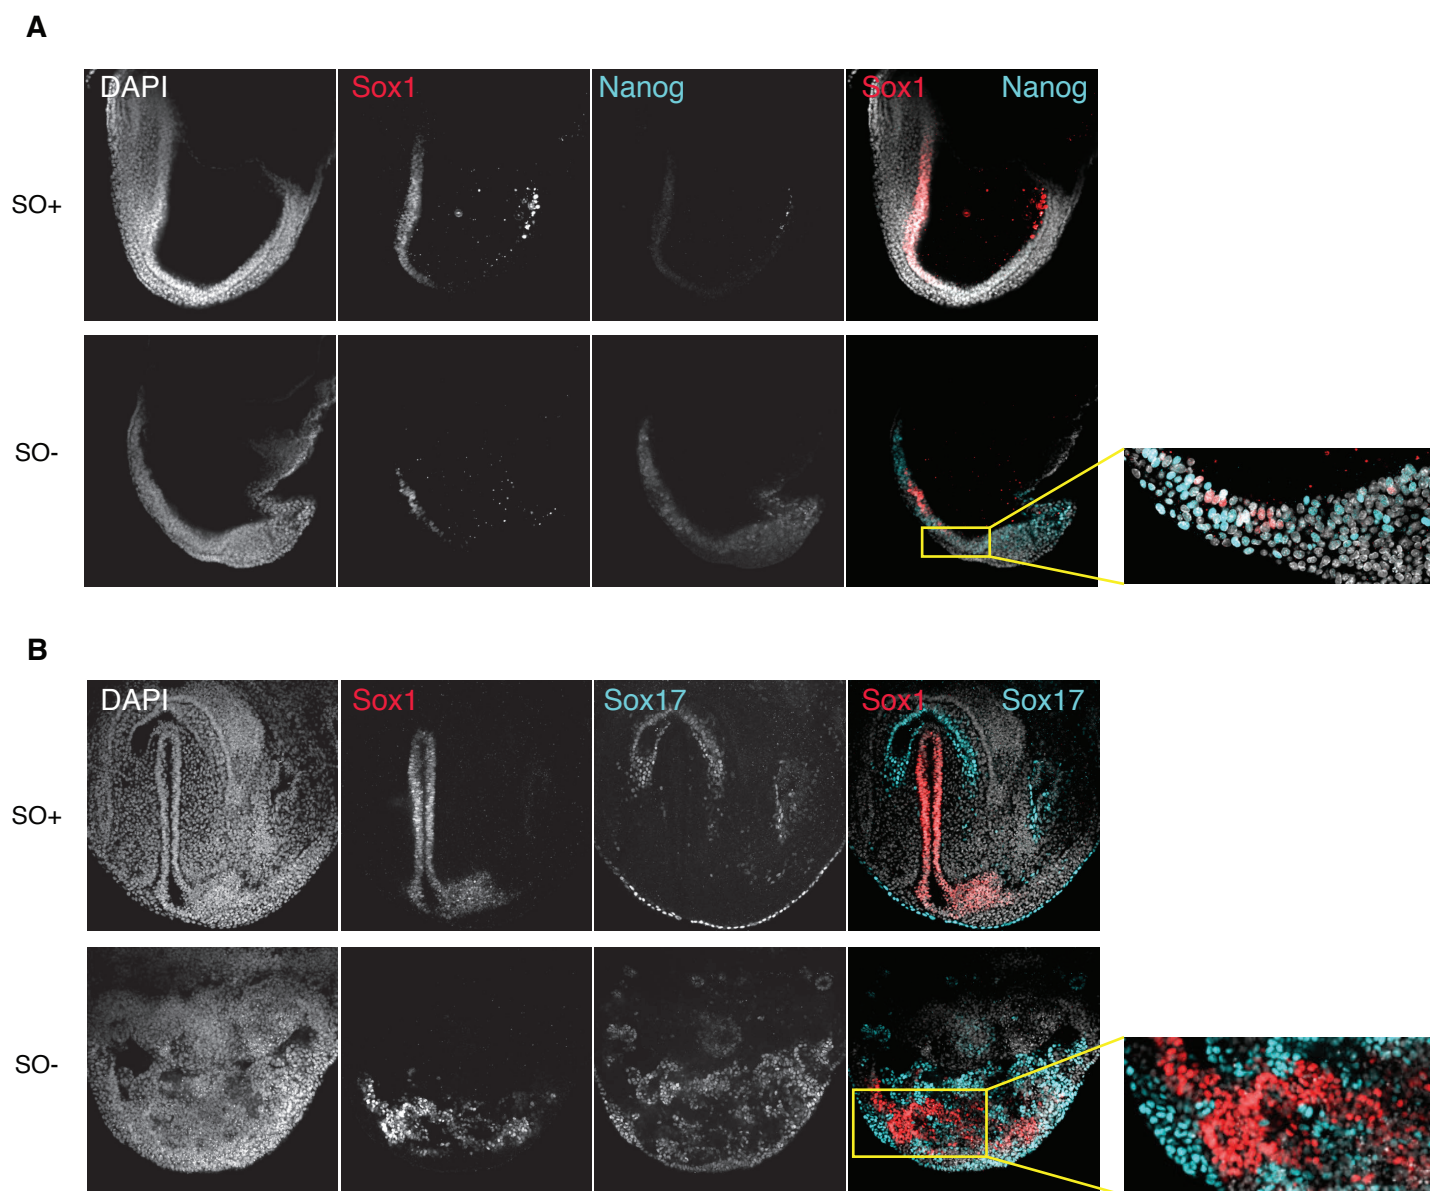

**Fig. S1. Oct4 mutant embryos do not aberrantly co-express lineage determinants.**

Immunostaining of E7.5-7.75 embryos for (A) Sox1 (red) and Nanog (turquoise) and (B) Sox1 (red) and Sox17 (turquoise). Top row of panels in each case shows SO+ embryos and bottom panels show SO- Oct4 mutants. Insets highlight regions in mutant embryos where the domains of marker expression have become disrupted, but there is apparently no co-expression of distinct lineages within any cell (A 40X, B digital zoom).

Figure S2

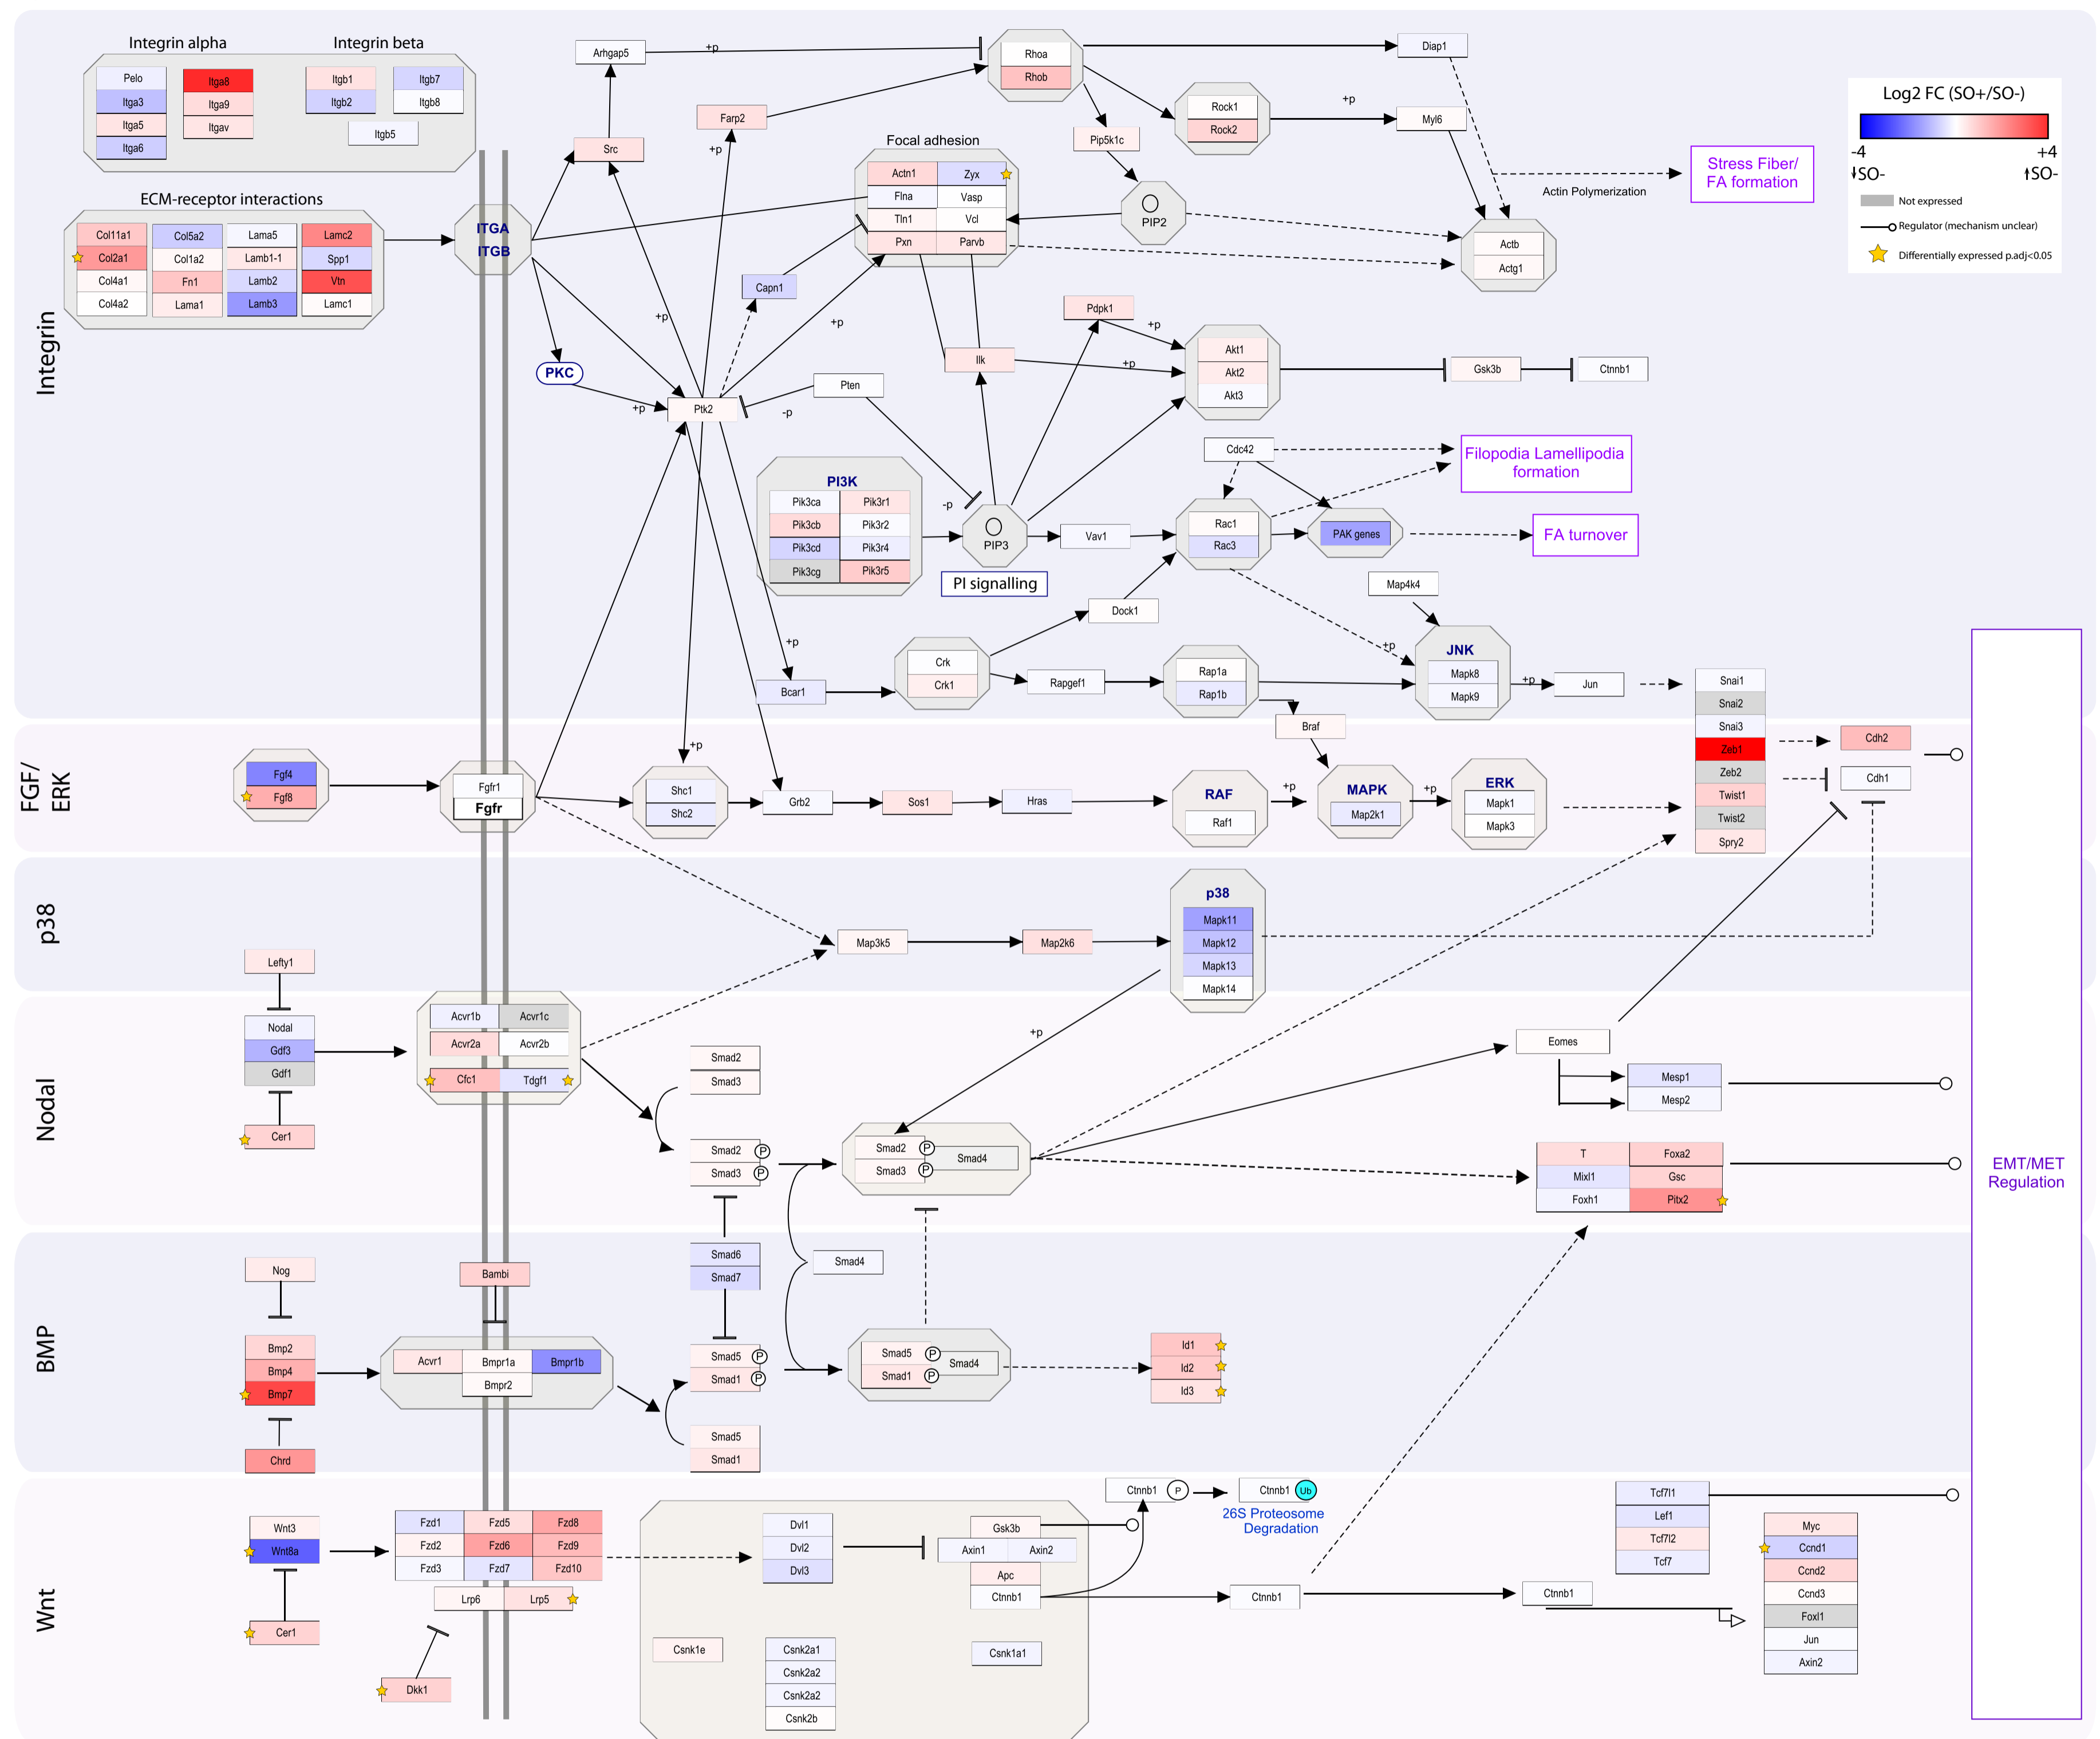

**Fig. S2. Signalling pathway components relevant to cell fate decision and gastrulation in the post-implantation embryo.** Only detected genes are shown. Each component is coloured based on the  $\log_2FC(SO+/SO-)$ . Stars indicate differentially expressed genes ( $p.adj < 0.05$ ).

Figure S3

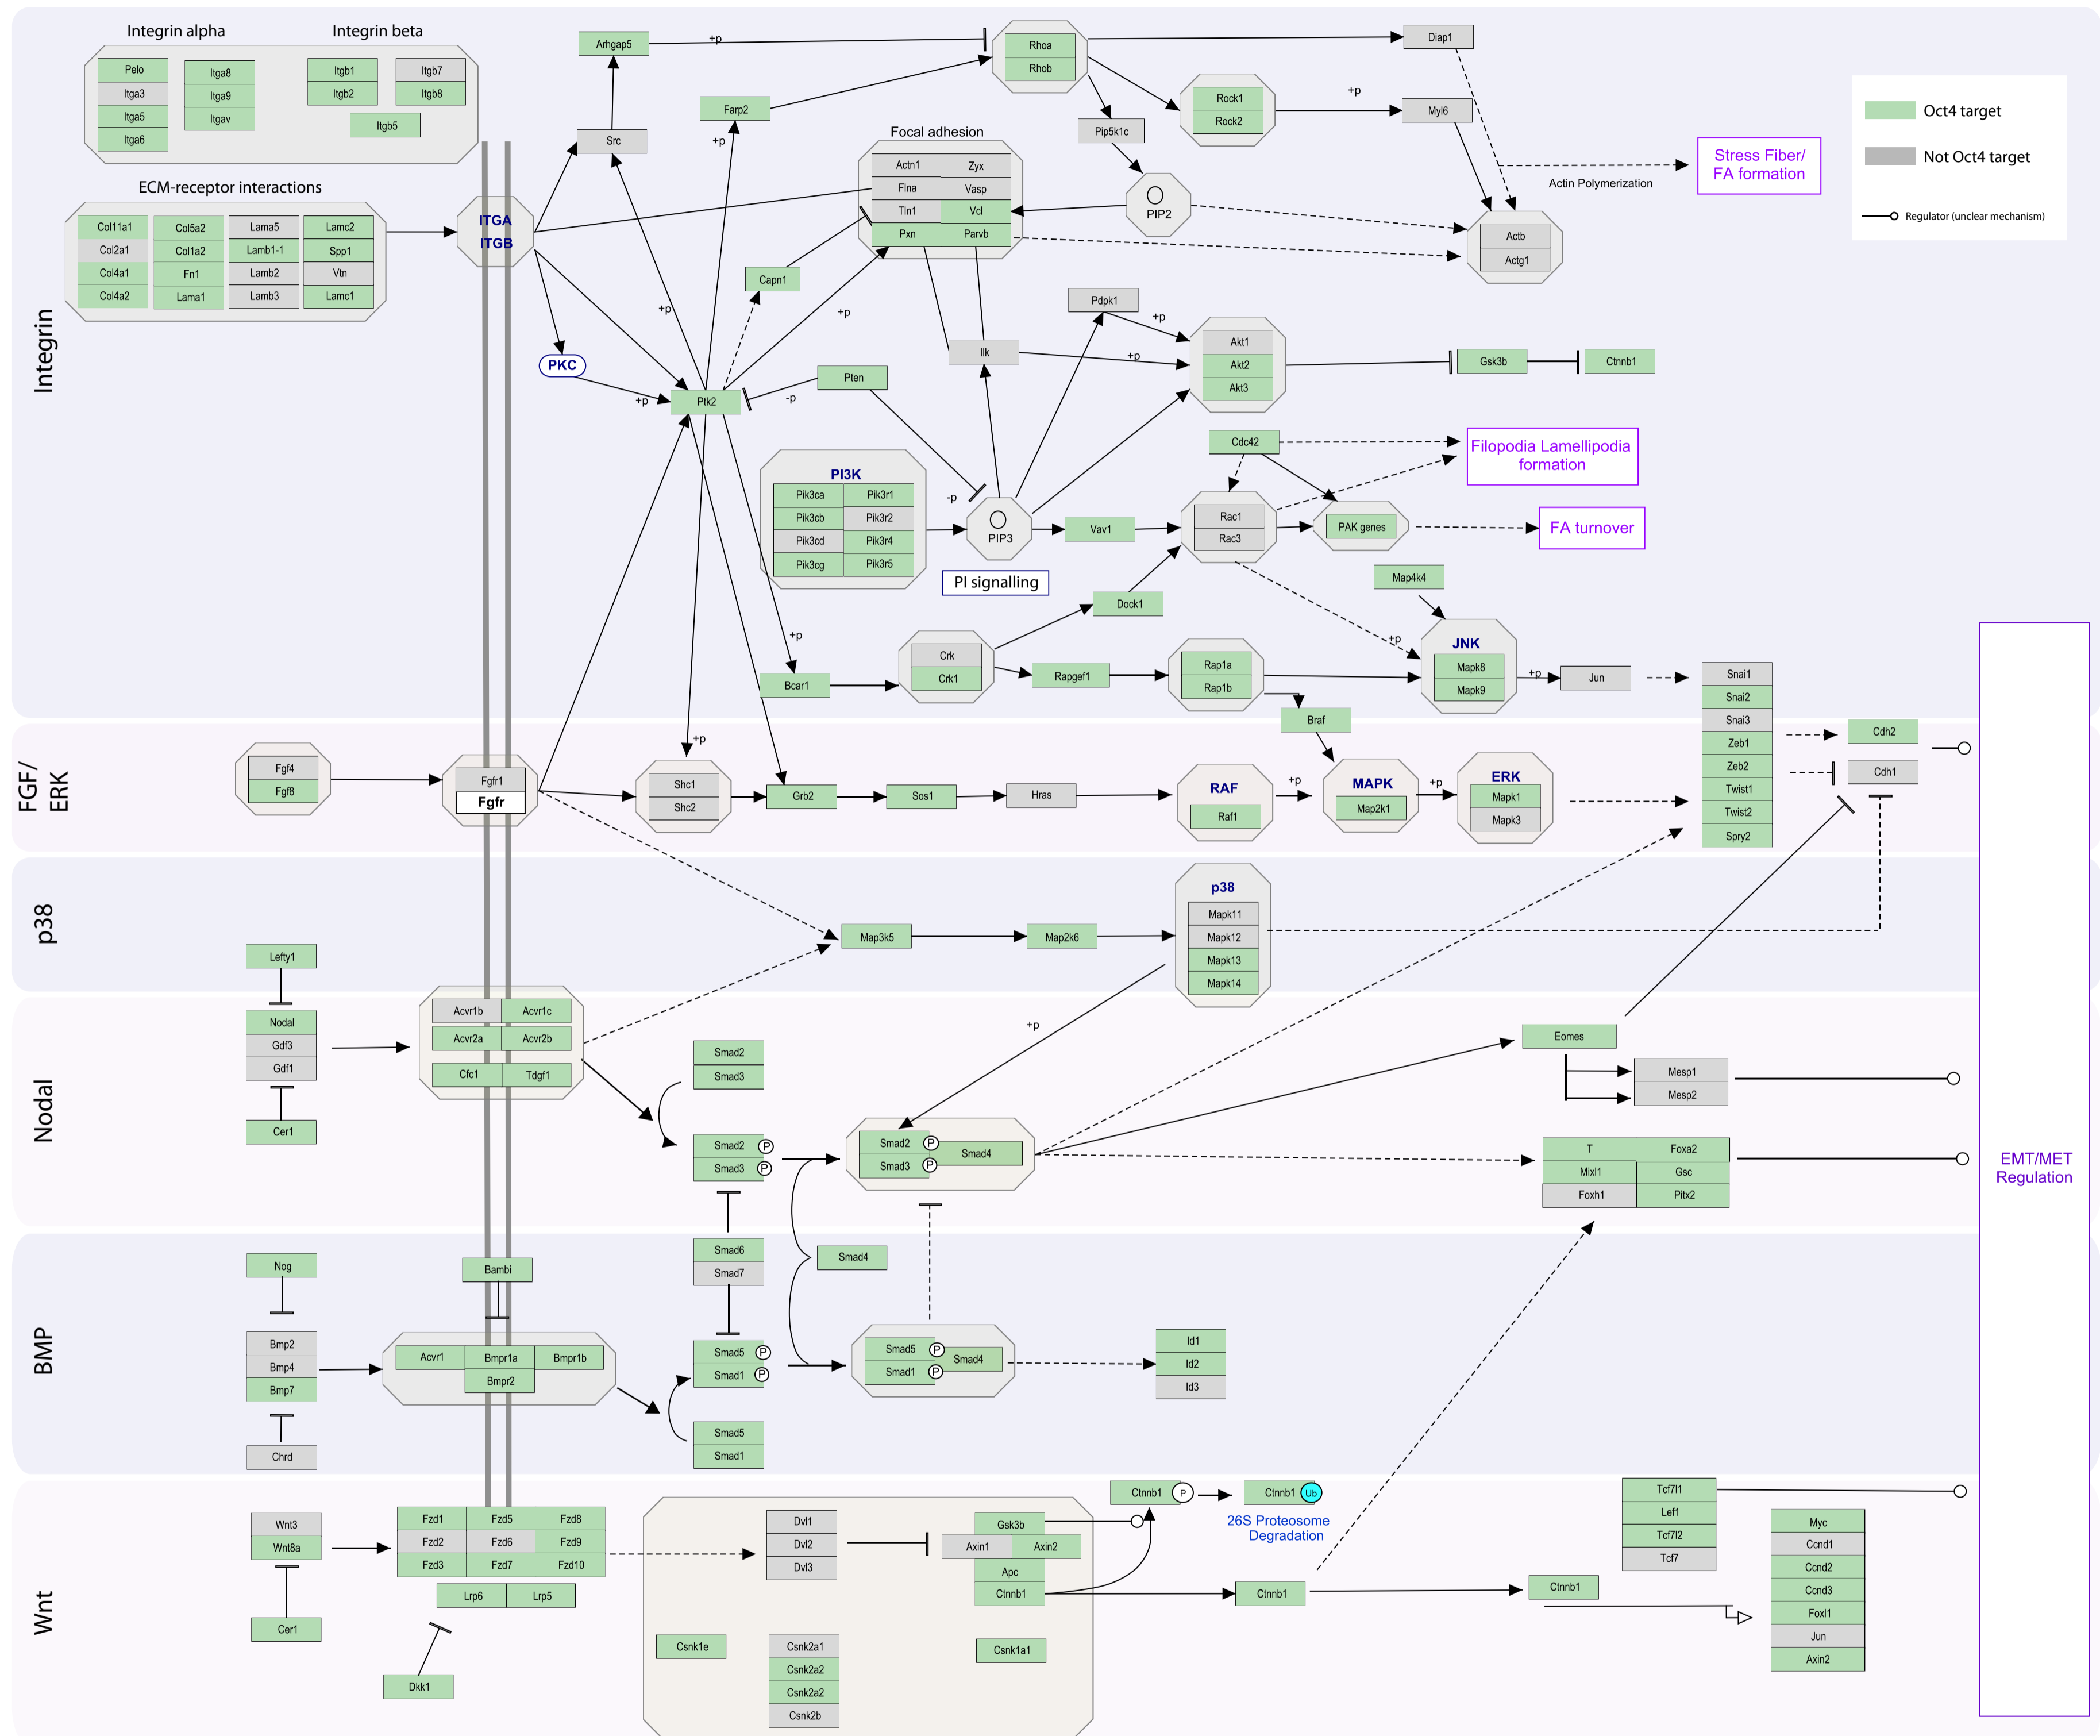

**Fig. S3.** Signalling pathway components relevant to cell fate decision and gastrulation in the post-implantation embryo. Genes shown in green have Oct4 binding peaks in EpiSCs within 50kb of the transcription start site. Chip-seq data from (Matsuda et al., 2017).

## Figure S4

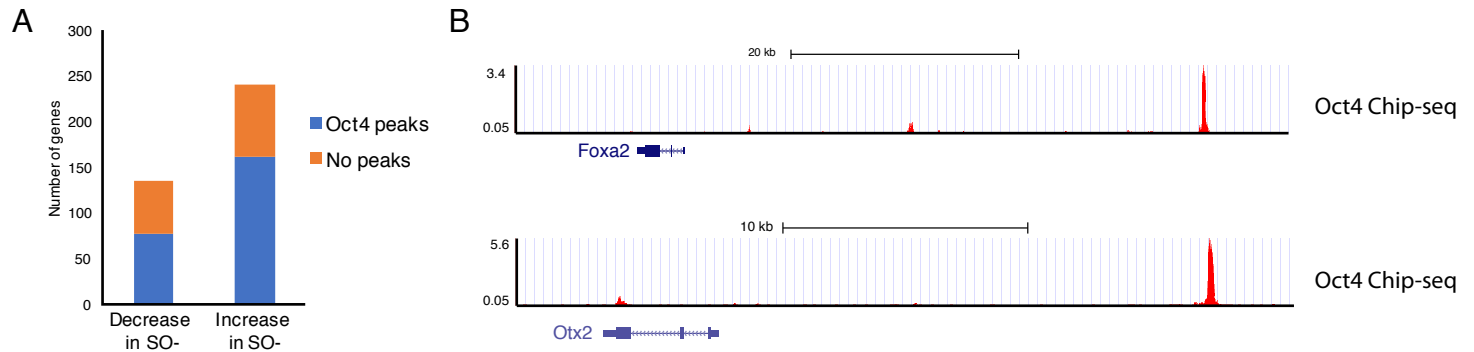

**Fig. S4.** (A) Breakdown of the number of genes upregulated and downregulated in SO- embryos compared to SO+ embryos and proportion of Oct4 bound genes. (B) Individual Chip-Seq tracks showing Oct4 binding within 40kb and 20kb of the promoter of *Foxa2* and *Otx2* in EpiSC.

Figure S5

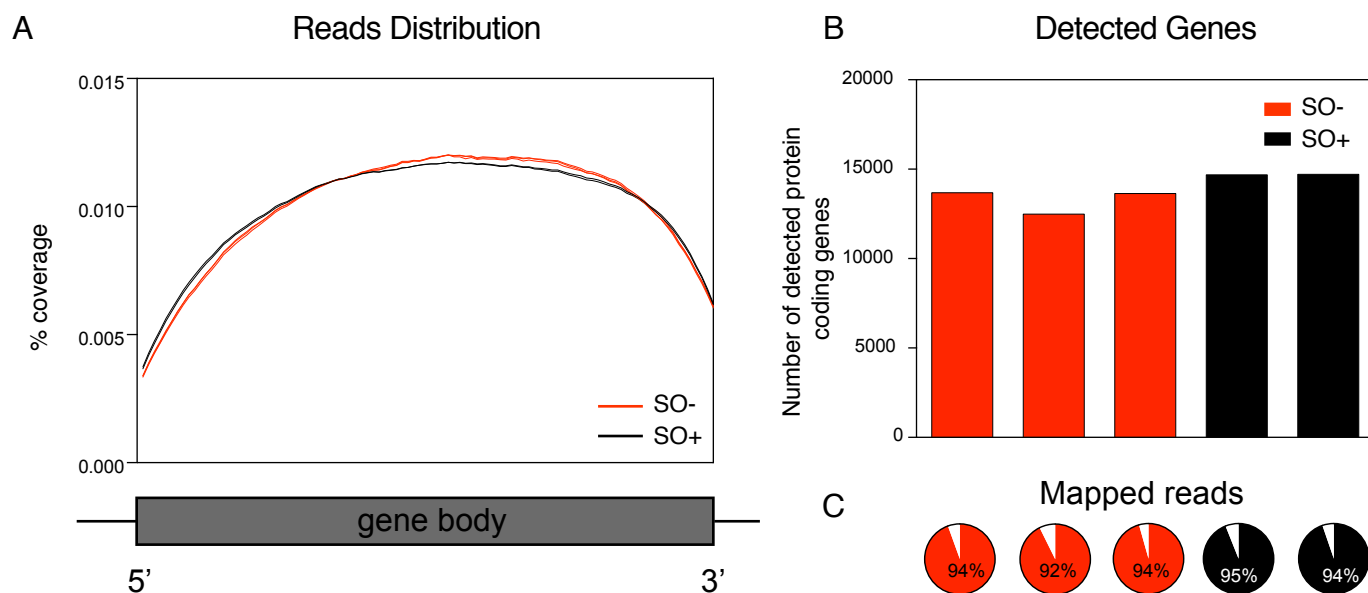

**Fig. S5. RNA-seq data quality control.** (A) Read distribution, (B) number of detected genes and (C) percentage of mapped reads across RNA-seq samples.

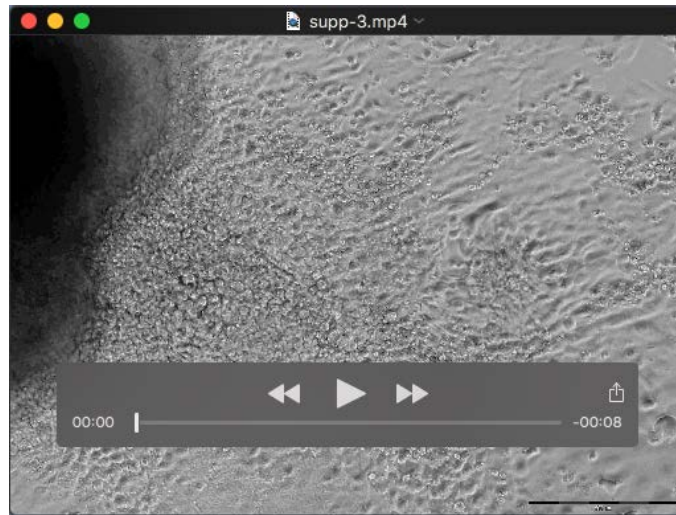

**Movie S1.** Live imaging of SO- outgrows showing beating cells.

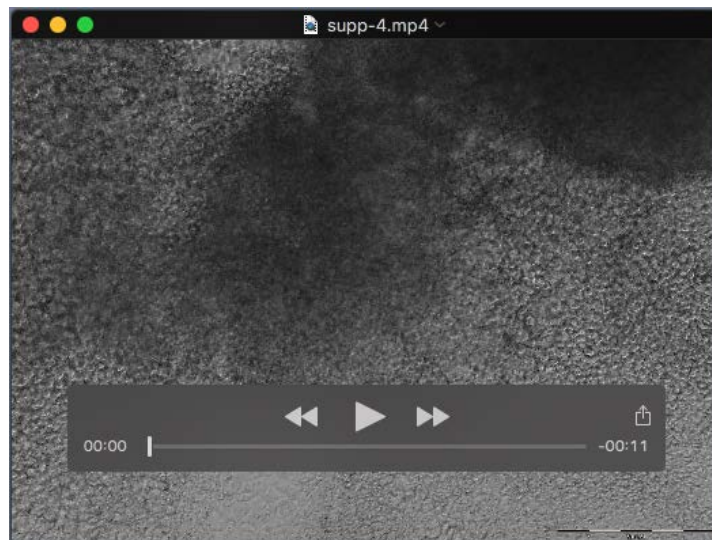

**Movie S2.** Live imaging of SO+ outgrows showing beating cells.

**Table S1.** Antibodies used in this study

| Antigen    | Company           | Cat. No        | Dilution |
|------------|-------------------|----------------|----------|
| Oct4       | Santa Cruz        | SC-5279 (C-10) | 1:200    |
| Oct4       | Santa Cruz        | SC-8628 (N-19) | 1:200    |
| Nanog      | eBioscience       | eBioMLC-51     | 1:200    |
| Sox2       | Abcam             | ab97959        | 1:200    |
| Brachyury  | R&D               | AF2085         | 1:200    |
| Mixl1      | Elephanty's group |                | 1:200    |
| Foxa2      | Santa Cruz        | SC-6554 (M-20) | 1:200    |
| Foxa2      | Cell Signalling   | 3148           | 1:200    |
| E-cadherin | Abcam             | ab15148        | 1:200    |
| Sox17      | R&D               | AF1924         | 1:200    |
| Otx2       | Abcam             | ab21990        | 1:200    |
| Sox1       | Cell Signalling   | 4194           | 1:200    |
| Tbx6       | R&D               | AF4744         | 1:200    |
| Cer1       | R&D               | MAB1986        | 1:100    |
| Snail      | Cell Signalling   | 3879           | 1:100    |

**Table S2.** Gene expression analysis of SO+ and SO- embryos.

[Click here to Download Table S2](#)
